# Supplementary material
Source: PubMed Central journal article supplement (PMC3048697)

**Supplemental fig 1.** The BACE inhibitor  $\text{D}_9\text{R9}$  alters  $\text{Na}_v1$   $\alpha$ -subunit levels in a dose-dependent manner. **(A)** Western blot analysis of  $\text{Na}_v1.1$ ,  $\text{Na}_v1.2$ , and  $\text{Na}_v1.6$  in rat primary neurons (DIV14) treated with various concentrations of  $\text{D}_9\text{R9}$  and control vehicle DMSO for 72 hrs. Same samples were used to show  $\text{Na}_v1.1$  level changes in Fig. 1A. **(B)** Graph showing quantitative analysis of  $\text{Na}_v1.1$  protein levels in rat primary neurons (DIV14) treated with various concentrations of  $\text{D}_9\text{R9}$  and control vehicle DMSO. **(C)** TaqMan real-time RT PCR analysis of *Scn1a* ( $\text{Na}_v1.1$ ), *Scn2a* ( $\text{Na}_v1.2$ ), and *Scn3a* ( $\text{Na}_v1.3$ ) mRNA levels in B104 rat neuroblastoma cells with or without stably expressing recombinant  $\beta_2$ -ICD, the intracellular domain of  $\text{Na}_v\beta_2$  (Student t-test; \*\*,  $p < 0.01$ ;  $n = 3$  for B104 control, 4 for B104/ $\beta_2$ -ICD). **(D)** TaqMan real-time RT PCR analysis of *scn1a* ( $\text{Na}_v1.1$ ) mRNA levels in WT and  $\text{Na}_v\beta_2$  KO neurons (DIV 14) treated with DMSO,  $\text{D}_9\text{R9}$ , or DAPT for 24 hrs.

**Supplemental fig 2.** Decreased  $\text{Na}_v1.1$  protein and mRNA levels in homozygous BACE1 knockout (BACE1-KO) as compared to heterozygous knockout mice (BACE1-HE) in the same litter. **(A)** Representative Western blot showing  $\text{Na}_v1.1$  levels in total brain extracts from 1-month old BACE1-HE and BACE1-KO. BACE1-KO and -HE shown here belong to the same littermate group. **(B)** Quantitative analysis of  $\text{Na}_v1.1$  protein levels in total brain extracts from BACE1-HE and BACE1-KO (Student t-test; \*,  $p < 0.05$ ;  $n = 5$  for BACE1-HE and 3 for BACE1-KO). Synaptophysin levels were used to normalize  $\text{Na}_v1.1$  levels.

**Supplemental fig 3.** Confocal immunofluorescence analysis of  $\text{Na}_v1.1$  (green) in hippocampal dentate gyrus and CA3 regions of 1-month-old wild type control (A) and BACE1-null (BACE1-KO, B).

**Supplemental fig 4.** Taqman real-time RT-PCR analysis of *scn2a* ( $\text{Na}_v1.2$ ) and *scn8a* ( $\text{Na}_v1.2$ ) mRNA levels in 1-month-old WT, BACE1-HE, and BACE1-KO (ANOVA followed by a *post-hoc* Tukey's test;  $n = 5$  for WT, 8 for BACE1-HE, and 6 for BACE1 KO). GAPDH levels were used to normalize *Scn2a* ( $\text{Na}_v1.2$ ) and *Scn8a* ( $\text{Na}_v1.2$ ) mRNA levels.

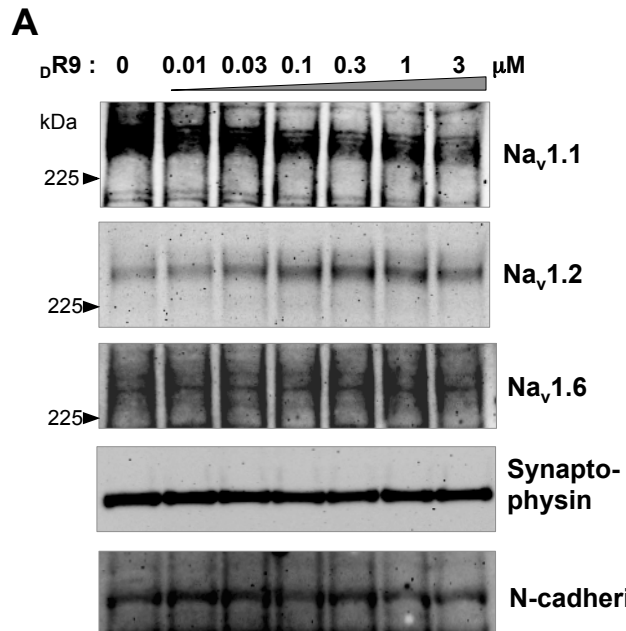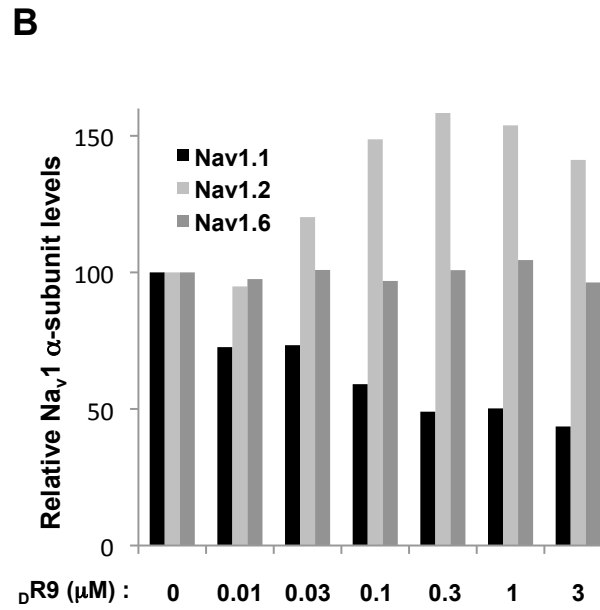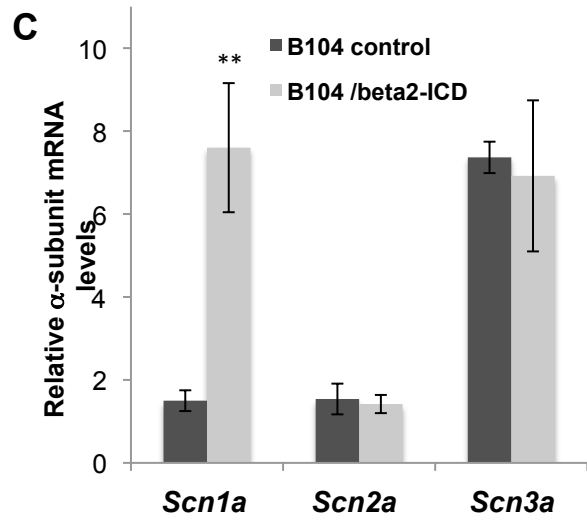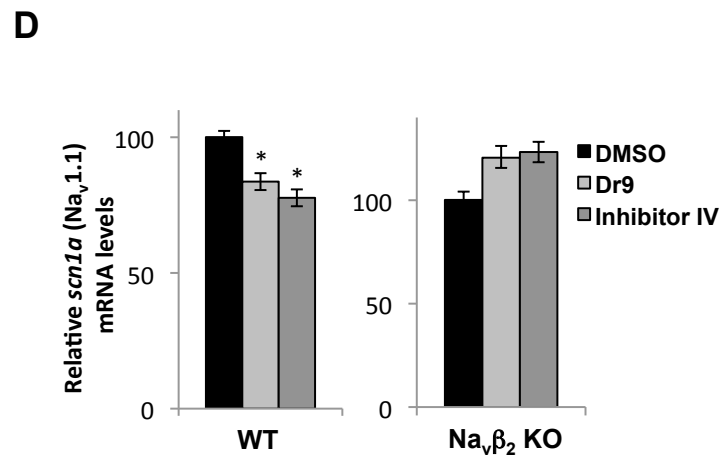

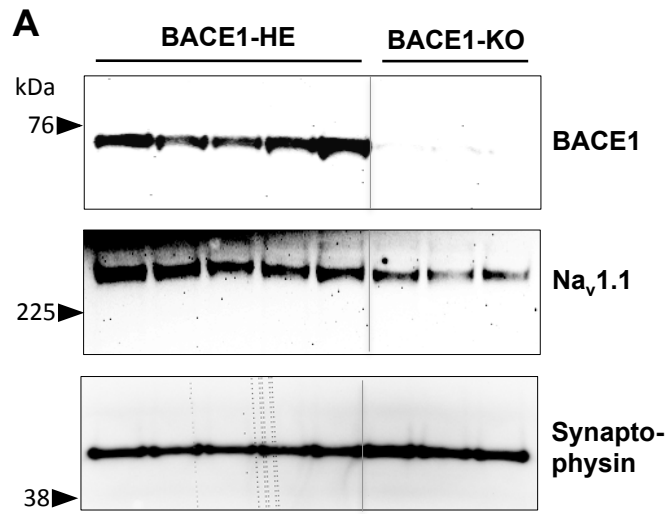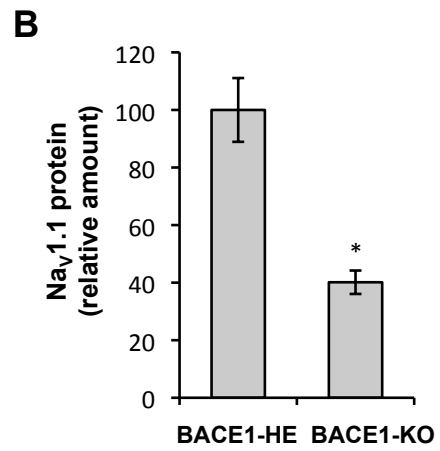

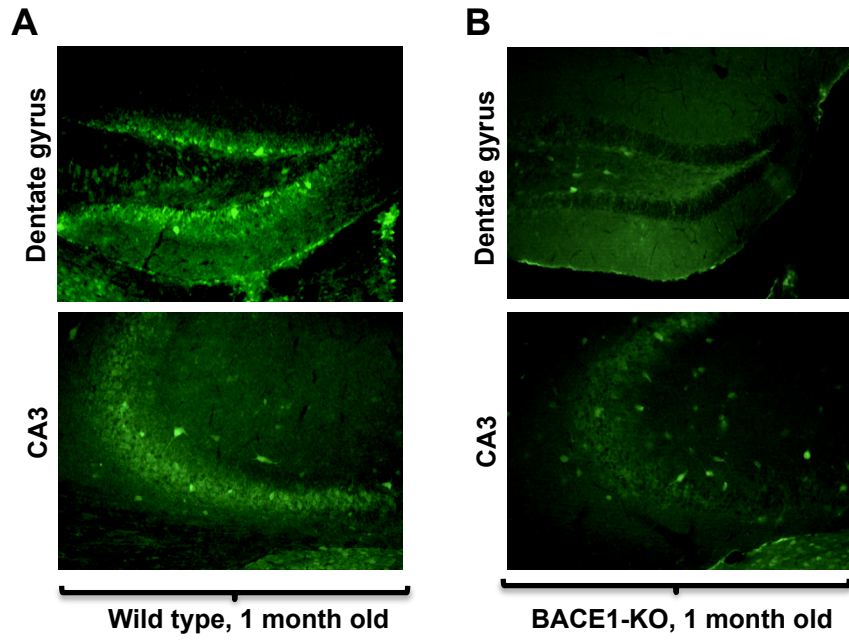

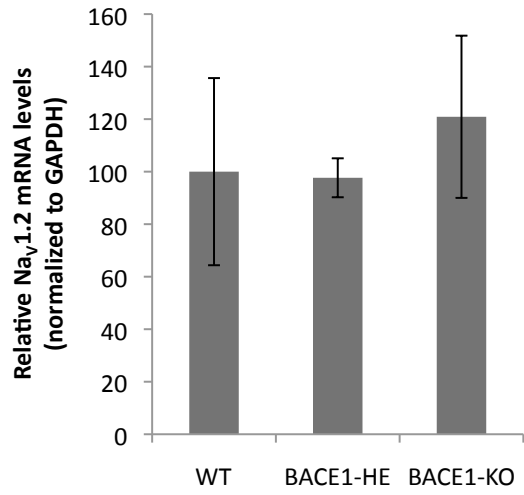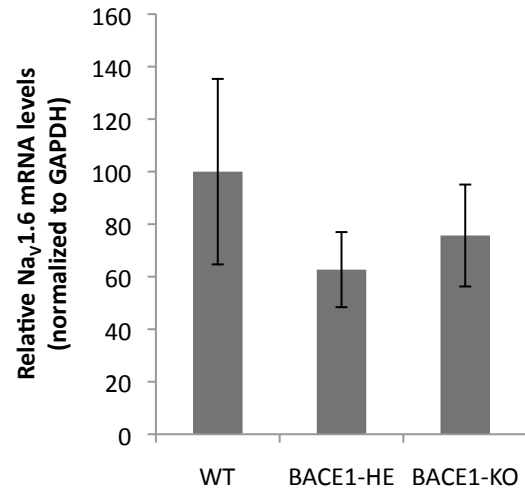

Supplement: supp_M110.134692_jbc.M110.134692-1.pdf [file supp_M110.134692_jbc.M110.134692-1.pdf]
